# Supplementary material for: Insight into the Reaction of Alexidine with Sodium Hypochlorite: A Potential Error in Endodontic Treatment
Source: PubMed Central journal article supplement (PMC7999803; doi:10.3390/molecules26061623), 2021-03-15
Supplement: molecules-26-01623-s001.pdf [file molecules-26-01623-s001.pdf]

## **The insight into the reaction of alexidine with sodium hypochlorite – a potential error in endodontic treatment**

**Barbara Czopik<sup>1\*</sup>, Monika Ciechomska<sup>2</sup>, Joanna Zarzecka<sup>1</sup>, Maciej Góra<sup>3</sup> and Michał Woźniakiewicz<sup>2</sup>**

<sup>1</sup> Department of Operative Dentistry with Endodontics, Institute of Stomatology, Jagiellonian University Medical College in Kraków, Montelupich 4, 30-155 Kraków, Poland; e-mail: [bczopik@o2.pl](mailto:bczopik@o2.pl), [j.zarzecka@uj.edu.pl](mailto:j.zarzecka@uj.edu.pl)

<sup>2</sup> Laboratory for Forensic Chemistry, Department of Analytical Chemistry, Faculty of Chemistry, Jagiellonian University, Gronostajowa 2, 30-387 Kraków, Poland; e-mail: [monikaciechomska@wp.pl](mailto:monikaciechomska@wp.pl), [michal.wozniakiewicz@uj.edu.pl](mailto:michal.wozniakiewicz@uj.edu.pl)

<sup>3</sup> Department of Organic Chemistry, Faculty of Chemistry, Jagiellonian University, Gronostajowa 2, 30-387 Kraków, Poland; e-mail: [maciej.gora74@gmail.com](mailto:maciej.gora74@gmail.com)

\* Correspondence: [bczopik@o2.pl](mailto:bczopik@o2.pl) ; Tel.: +48 608505816

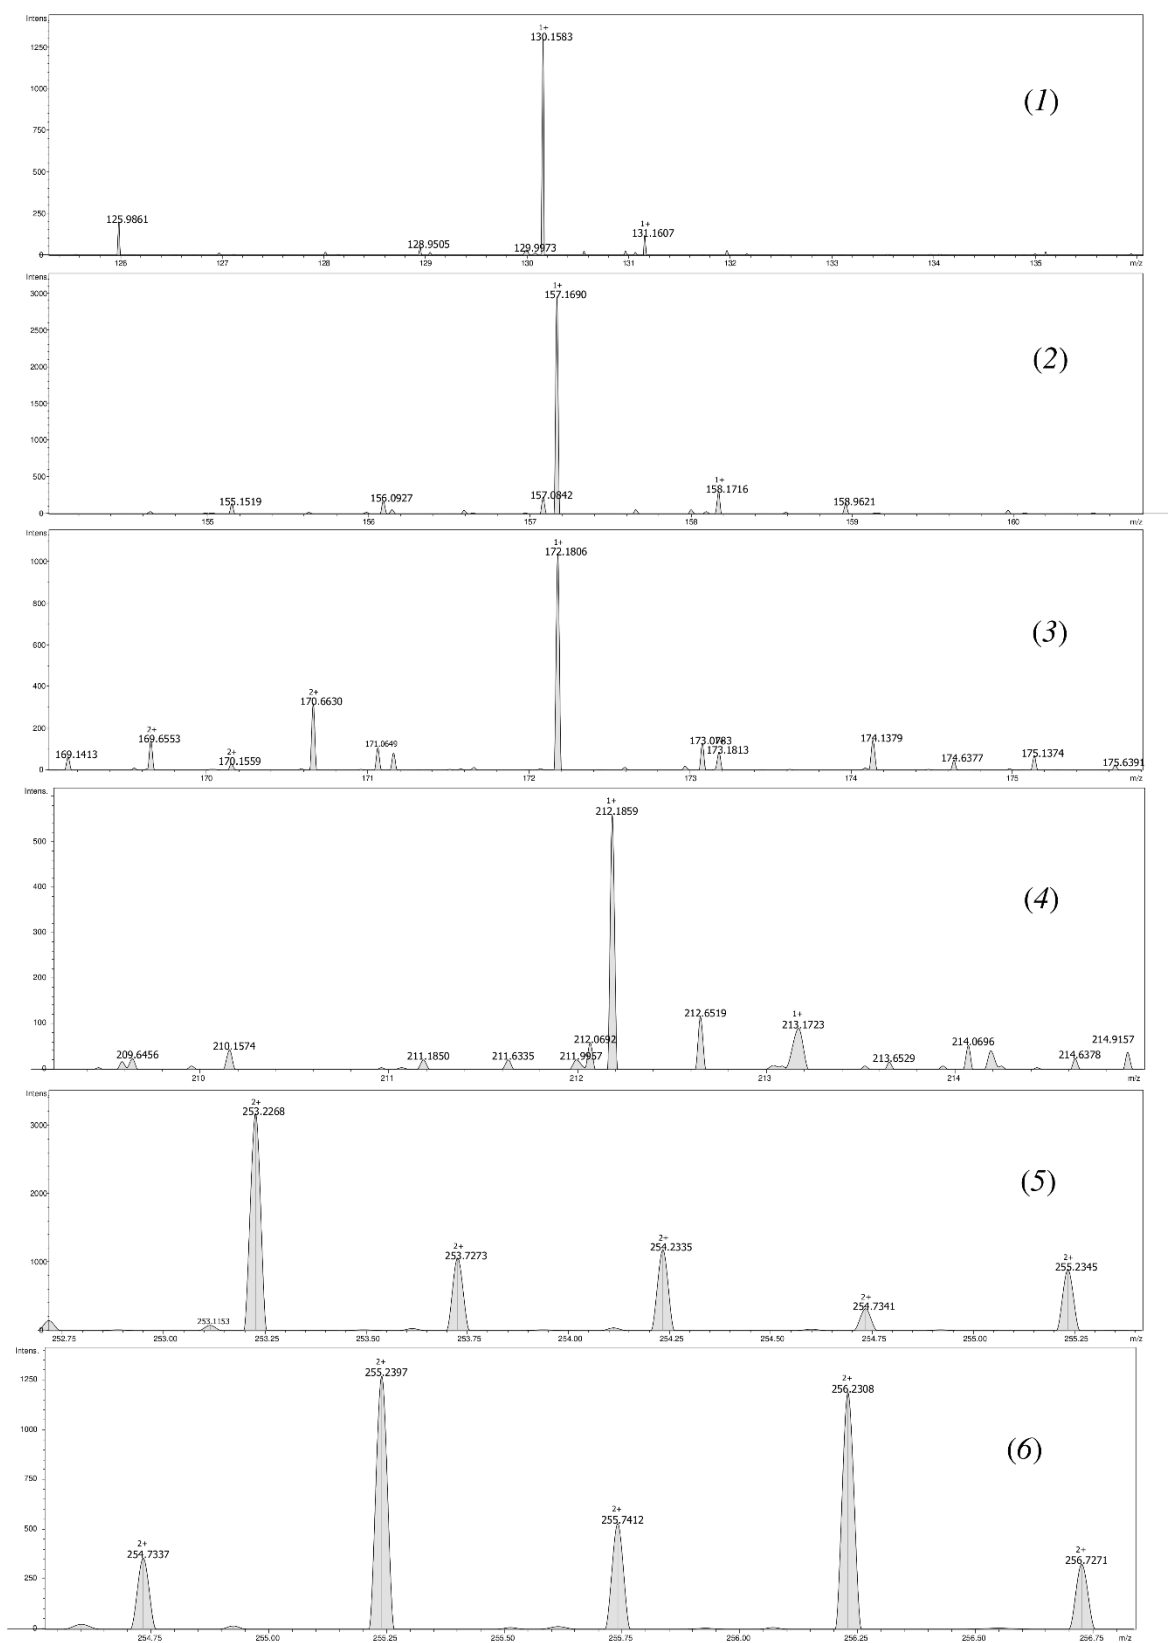

Fig. 1-S. Mass spectra of investigated compound generated during the reaction between ALX and NaOCl. See Table 1 in the main manuscript for compounds 1-6.

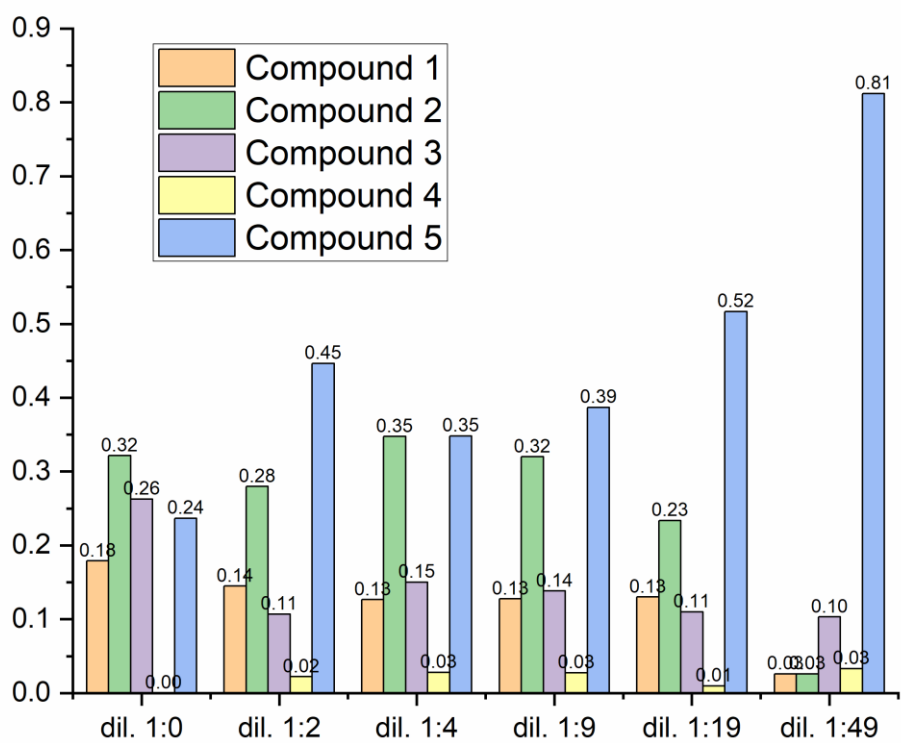

Fig. 2-S Relative abundance of investigated ALX – NaOCl reaction products depending on dilution of 5.25% (w/v) NaOCl reagent (in v/v).
